# Supplementary material for: IGFBP-2 and -3 co-ordinately regulate IGF1 induced matrix mineralisation of differentiating human dental pulp cells
Source: PubMed Central journal article supplement (PMC5153425; doi:10.1016/j.scr.2016.09.026), 2016-11

### **Supplementary Table I**

| <b>Donor</b> | <b>Tooth</b>        | <b>Age</b> | <b>Gender</b> | <b>Ethnic Origin</b> |
|--------------|---------------------|------------|---------------|----------------------|
| 1            | Healthy third molar | 20         | Female        | Asian                |
| 2            | Healthy third molar | 35         | Female        | Cauc.                |

|   |                     |    |        |       |
|---|---------------------|----|--------|-------|
| 3 | Healthy third molar | 24 | Female | Cauc. |
|---|---------------------|----|--------|-------|

**Supple**  
**mentar**  
**Y**  
**Table**  
**II**

| <i>Gene Name</i> | <i>TaqMan®Gene expression assay identifier</i> |
|------------------|------------------------------------------------|
| <i>GAPDH</i>     | Hs99999905_m1                                  |
| <i>ALPL</i>      | Hs01029144_m1                                  |
| <i>OCN</i>       | Hs00609452_g1                                  |
| <i>Runx2</i>     | Hs00231692_m1                                  |
| <i>IGF1</i>      | Hs01547656_m1                                  |
| <i>IGF2</i>      | Hs04188276_m1                                  |
| <i>IGF1R</i>     | Hs00609566_m1                                  |
| <i>IGF2 R</i>    | Hs00974474_m1                                  |
| <i>IGFBP 1</i>   | Hs00236877_m1                                  |
| <i>IGFBP 2</i>   | Hs01040719_m1                                  |
| <i>IGFBP 3</i>   | Hs00426289_m1                                  |
| <i>IGFBP4</i>    | Hs01057900_m1                                  |
| <i>IGFBP 5</i>   | Hs00181213_m1                                  |
| <i>IGFBP 6</i>   | Hs00181853_m1                                  |

**Figure 1S**

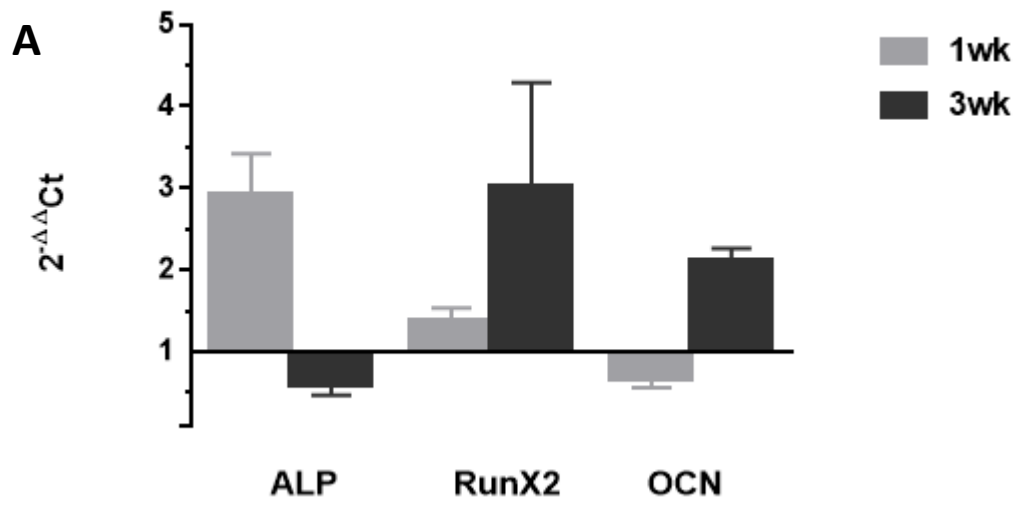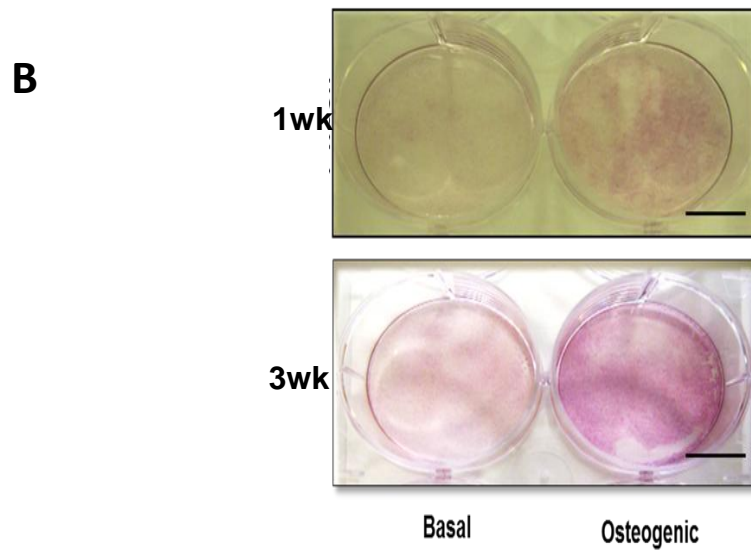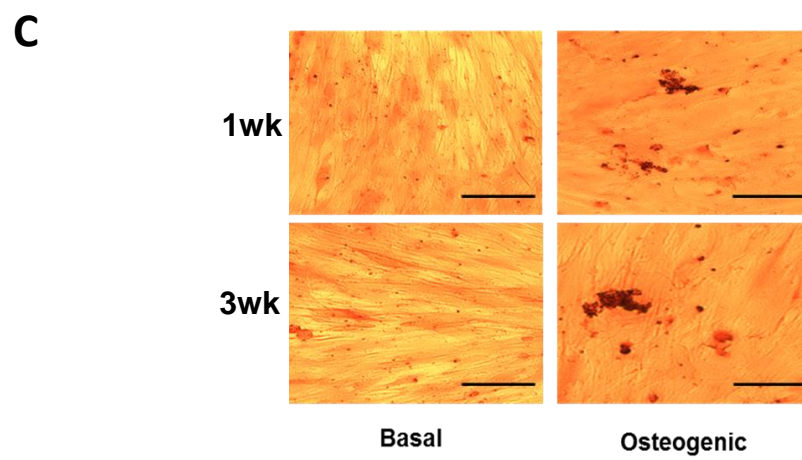

**Figure 2S**

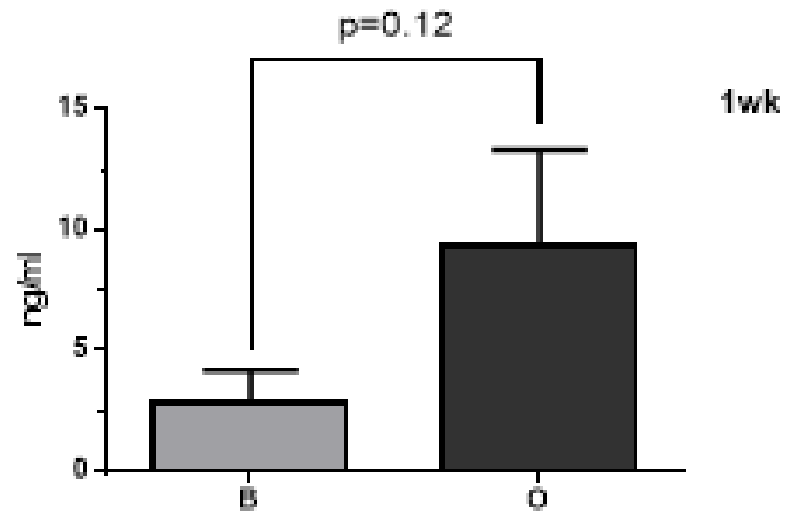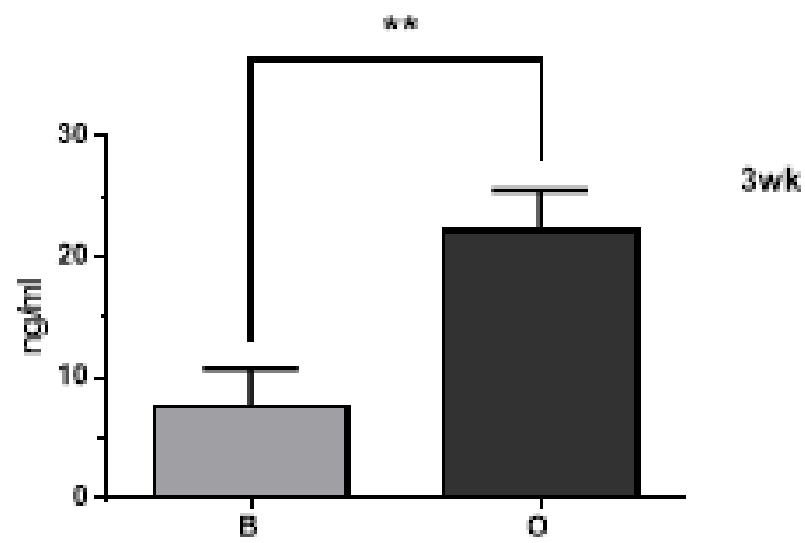

**Figure 3S**

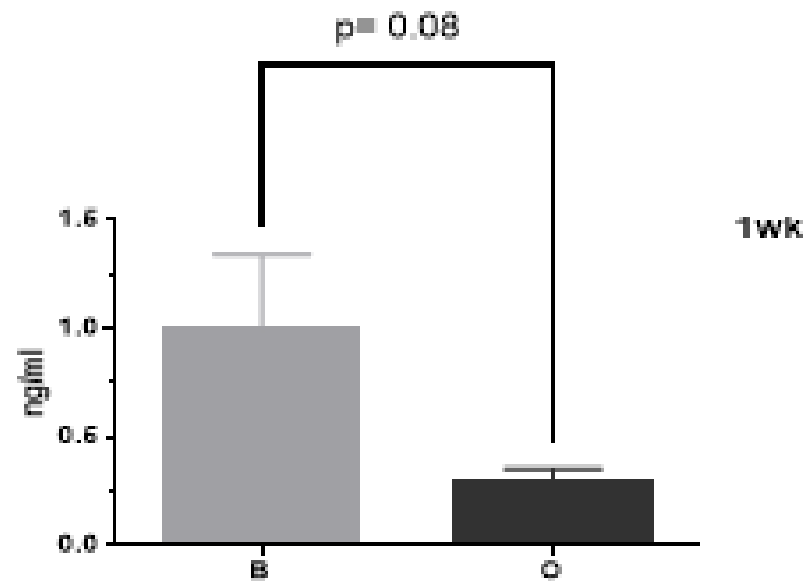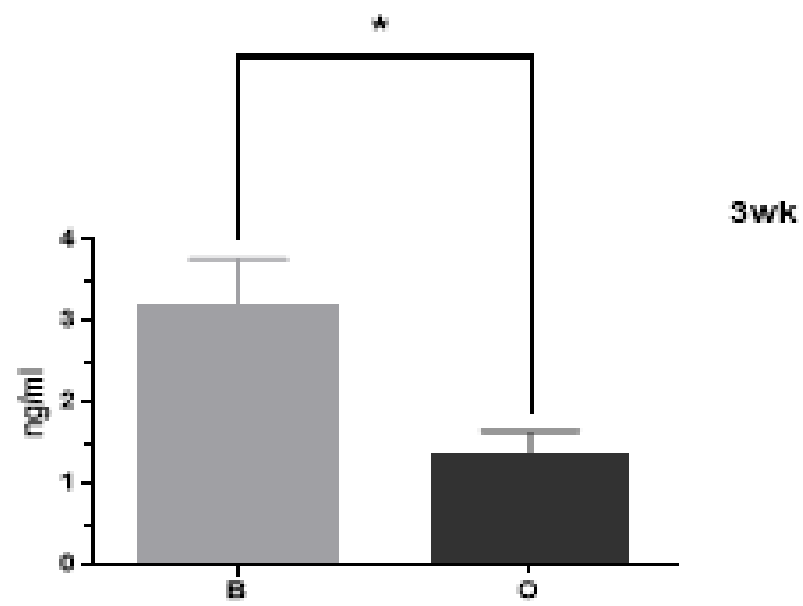

Figure 4S

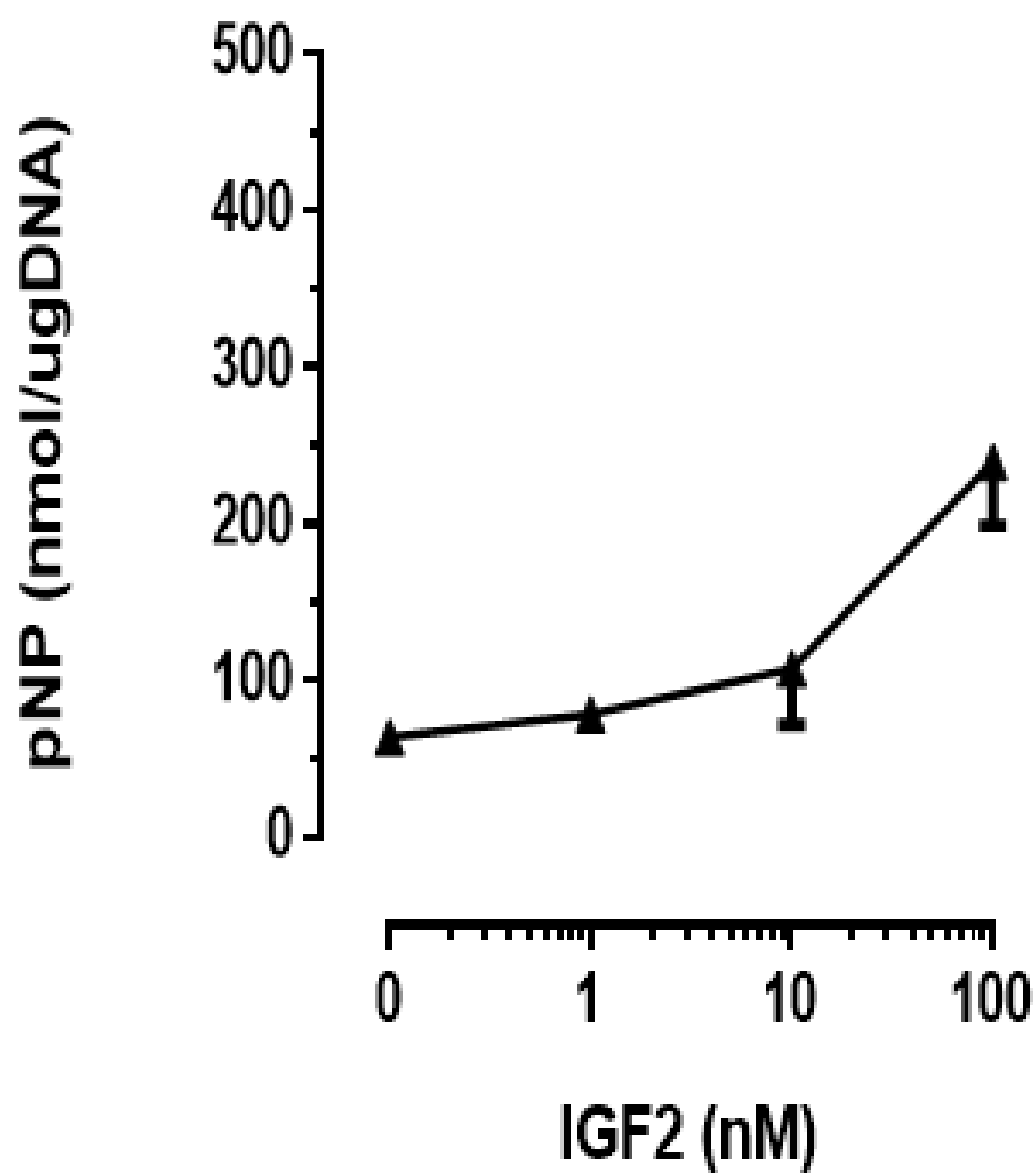

Supplement: mmc1.pdf [file mmc1.pdf]
